# Supplementary material for: FTO and ADRB2 Genetic Polymorphisms Are Risk Factors for Earlier Excessive Gestational Weight Gain in Pregnant Women with Pregestational Diabetes Mellitus: Results of a Randomized Nutrigenetic Trial
Source: Nutrients. 2022 Mar 1;14(5):1050. doi: 10.3390/nu14051050 (PMC8912276; doi:10.3390/nu14051050)
Supplement: Supplementary file 1 [file nutrients-14-01050-s001.zip › nutrients-1580872-supplementary.pdf]

**Supplementary Table S1**–Comparison of gestational weight gain (kg) between diet groups according to pregestational BMI (Rio de Janeiro/Brazil, 2016–2020).

|                                                                                         | Overall<br><i>n</i> = 70 | Traditional Diet<br><i>n</i> = 41 | DASH<br>Diet<br><i>n</i> = 29 | <i>p</i> -<br>Value* |
|-----------------------------------------------------------------------------------------|--------------------------|-----------------------------------|-------------------------------|----------------------|
| <b>Normal weight</b>   BMI 18.5–24.9 kg/m <sup>2</sup>   Recommended GWG: 11.5 to 16 kg |                          |                                   |                               |                      |
|                                                                                         | 13.7<br>(11.5–17.5)      | 13.7<br>(11.6–15.6)               | 15.5<br>(10.0–19.9)           | 0.57                 |
| <b>Overweight</b>   BMI 25.0 a 29.9 kg/m <sup>2</sup>   Recommended GWG: 7 to 11.5 kg   |                          |                                   |                               |                      |
|                                                                                         | 11.8<br>(7.5–16.4)       | 11.0<br>(7.6–16.3)                | 12.9<br>(7.0–16.8)            | 0.93                 |
| <b>Obesity</b>   BMI ≥ 30.0 kg/m <sup>2</sup>   Recommended GWG: 5 to 9 kg              |                          |                                   |                               |                      |
|                                                                                         | 11.0<br>(5.9–14.1)       | 9.0<br>(5.6–13.6)                 | 11.2<br>(8.9–14.4)            | 0.50                 |

BMI, body mass index; GWG, gestational weight gain.

Data presented as median and interquartile range.

\* U Mann–Whitney test.

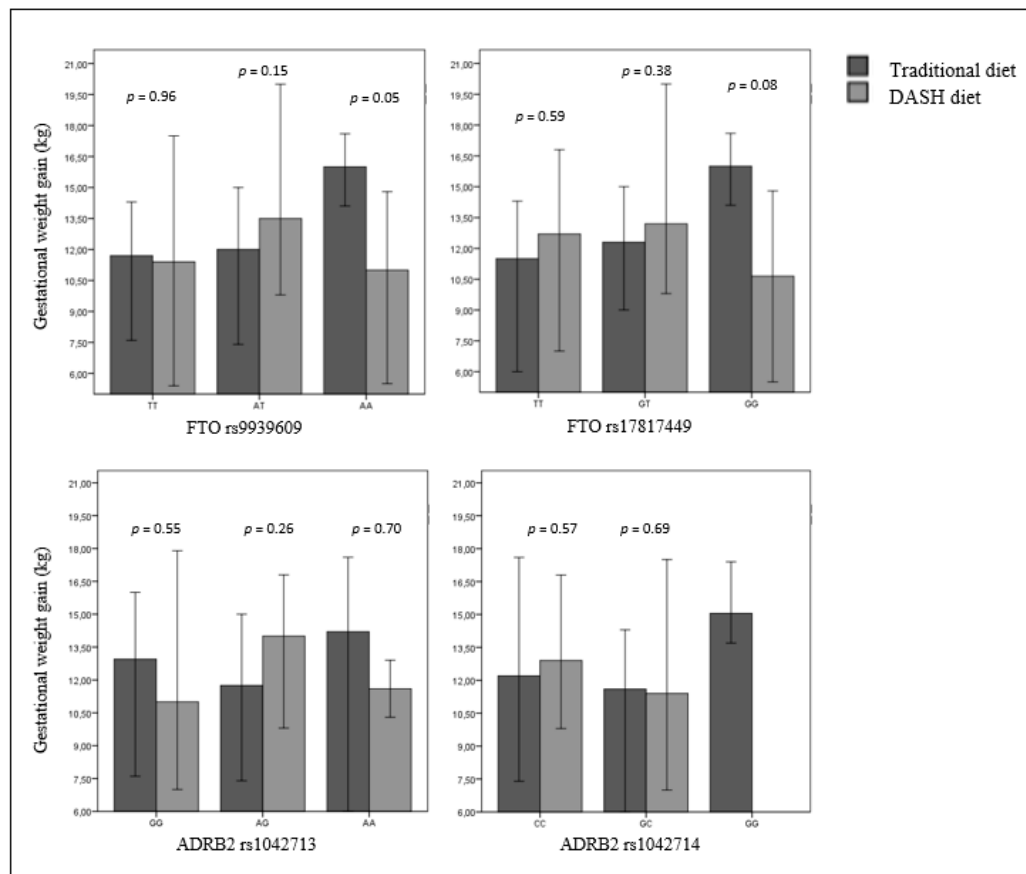

**Supplementary Figure S1.** Gestational weight gain according to genotypes and dietary patterns. FTO, fat mass and obesity gene; ADRB2, adrenoceptor beta 2 gene; DASH, Dietary Approach to Stop Hypertension. Gestational weight gain (kg) presented as median and error bars 95% CI; *p*-values resulting from Mann–Whitney U test.
